# Supplementary material for: Iodine solid sorbent design: a literature review of the critical criteria for consideration
Source: Royal Society of Chemistry journal article supplement (doi:10.1039/d4ma00266k), 2024-01-01
Supplement: d4ma00266k1.pdf [file d4ma00266k1.pdf]

SUPPORTING INFORMATION

***Iodine solid sorbent design: A literature review of the critical criteria for consideration***

Brian J. Riley,<sup>(a),1</sup> Joshua R. Turner,<sup>(b),\*</sup> Joanna McFarlane,<sup>(c)</sup> Saehwa Chong,<sup>(a)</sup> Krista Carlson,<sup>(d)</sup> and Josef Matyas<sup>(a)</sup>

<sup>(a)</sup> *Pacific Northwest National Laboratory, Richland, WA (USA)*

<sup>(b)</sup> *National Nuclear Laboratory, Sellafield, Cumbria (UK)*

<sup>(c)</sup> *Oak Ridge national Laboratory, Oak Ridge, TN (USA)*

<sup>(d)</sup> *University of Nevada Reno, Reno, NV (USA)*

*Keywords: iodine sorbent; sorbent design; oxidizing environments; chemisorption; silver; bismuth; copper*

---

<sup>1</sup> *Corresponding authors:* [brian.riley@pnnl.gov](mailto:brian.riley@pnnl.gov), +1 (509) 372-4651; [joshua.r.turner@uknlnl.com](mailto:joshua.r.turner@uknlnl.com)

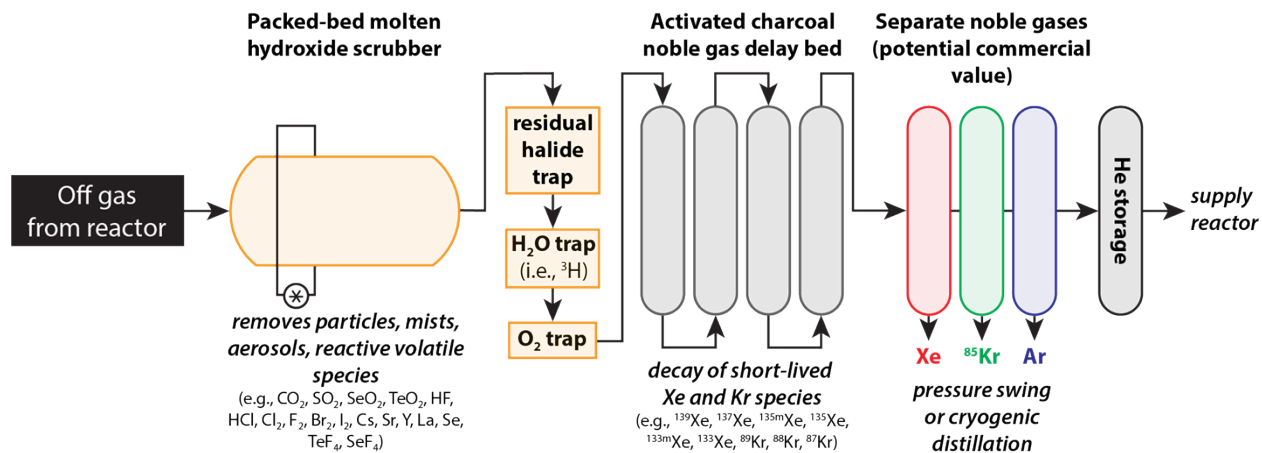

**Figure S1. Schematic of the overall off-gas system for a commercial MSR based on the MSRE experience. All the components shown, except the molten hydroxide packed-bed scrubber, are commercially available. This figure was reprinted with permission from Riley et al.<sup>S1</sup>**

## References

- S1. B. J. Riley, J. Mcfarlane, G. DelCul, J. D. Vienna, C. I. Contescu, L. M. Hay, A. V. Savino and H. E. Adkins, *Identification of Potential Waste Processing and Waste Form Options for Molten Salt Reactors*, Pacific Northwest National Laboratory, Richland, WA, 2018.
